# Supplementary material
Source: PubMed Central journal article supplement (PMC6497948)
Supplement: supp_RA118.006483_141640_1_supp_287785_pn1lwj.pdf [file supp_RA118.006483_141640_1_supp_287785_pn1lwj.pdf]

## Supplemental information

Zebrafish Olfactory Receptors ORAs Differentially Detect Bile Acids and Bile Salts

Xiaojing Cong,<sup>2,†</sup> Qian Zheng,<sup>1,†</sup> Wenwen Ren,<sup>5,†</sup> Jean-Baptiste Cheron,<sup>2</sup> Sébastien Fiorucci,<sup>2</sup> Tieqiao Wen,<sup>1</sup>  
Chunbo Zhang,<sup>6</sup> Hongmeng Yu,<sup>3\*</sup> Jérôme Golebiowski<sup>2,4\*</sup> and Yiqun Yu<sup>1,3\*</sup>

From the <sup>1</sup> School of Life Sciences, Shanghai University, Shanghai 200444, People's Republic of China; <sup>2</sup> Université Côte d'Azur, CNRS, Institut de Chimie de Nice UMR7272, Nice 06108, France; <sup>3</sup> Department of Otolaryngology, Eye, Ear, Nose & Throat Hospital, Shanghai Key Clinical Disciplines of Otorhinolaryngology, Fudan University, Shanghai 200031, People's Republic of China; <sup>4</sup> Department of Brain and Cognitive Sciences, Daegu Gyeongbuk Institute of Science and Technology, Daegu 711-873, South Korea; <sup>5</sup> Institutes of Biomedical Sciences, Fudan University, Shanghai 200031, People's Republic of China; and <sup>6</sup> Department of Biological and Chemical Sciences, Illinois Institute of Technology, Chicago, IL 60616, USA

† These authors contributed equally to this work.

\* To whom correspondence should be addressed: [hongmengyush@fudan.edu.cn](mailto:hongmengyush@fudan.edu.cn), [jerome.golebiowski@unice.fr](mailto:jerome.golebiowski@unice.fr) or [yiqun\\_yu@shu.edu.cn](mailto:yiqun_yu@shu.edu.cn)

### Supplemental information including:

Table S1. Structures of the steroid compounds tested by *in vitro* screening.

Table S2. Potency of the steroid compounds for zebrafish ORAs in Hana3A cells.

Table S3. Zebrafish behavioral responses to ORA ligands.

Table S4. ORA sequence identity and similarity.

Table S5. Effect of point mutations on the ORAs' response to ligands.

Fig. S1. Dose-response curves for the ORA ligands identified.

Fig. S2. Rhodopsin tag influenced ORAs' response to the bile acids.

Fig. S3. Sequence alignment of zebrafish ORAs with hAGTR1.

Fig. S4. Surface expression of ORA5 and ORA6 *wt* and mutants.

Fig. S5. Control mutations that have marginal effects on the receptors' response to LCA.

Fig. S6. Predicted ChA binding mode in *wt* ORA5 and ORA6.

**Table S1. Structures of the steroid compounds tested by *in vitro* screening.**

Physical properties of the ORA ligands identified (the top nine) were calculated by Dragon 6 [1]: LogP, partition coefficient; Sv, sum of atomic van der Waals volumes (scaled on Carbon atom).

| Active ORA ligands                                        |                                                       |                                                         |
|-----------------------------------------------------------|-------------------------------------------------------|---------------------------------------------------------|
| <br>Lithocholic acid<br>(LCA), logP 4.9, Sv 37            | <br>Glycolithocholic acid<br>(GLCA), logP 4.0, Sv 41  | <br>Norlithocholic acid<br>(NLCA), logP 4.7, Sv 35      |
| <br>3-ketolithocholic acid<br>(3-KLCA), logP 4.8, Sv 36   | <br>Tauro lithocholic acid<br>(TLCA), logP 3.5, Sv 43 | <br>7-ketolithocholic acid<br>(7-KLCA), logP 4.0, Sv 37 |
| <br>12-ketolithocholic acid<br>(12-KLCA), logP 4.0, Sv 37 | <br>Murocholic acid<br>(MCA), logP 4.1, Sv 37         | <br>Cholanolic acid<br>(ChA), logP 5.7, Sv 36           |
| Inactive steroid compounds                                |                                                       |                                                         |
| <br>Isolithocholic acid (iso-LCA)                         | <br>lithocholic acid 3-sulfate disodium               | <br>5 $\alpha$ -cholanolic acid-3 $\beta$ -ol           |
| <br>7,12-ketolithocholic acid (7,12-KLCA)                 | <br>tauro lithocholic acid 3-sulfate disodium         | <br>5 $\alpha$ -cholanolic acid-3-one methyl ester      |

Table S1. Continued.

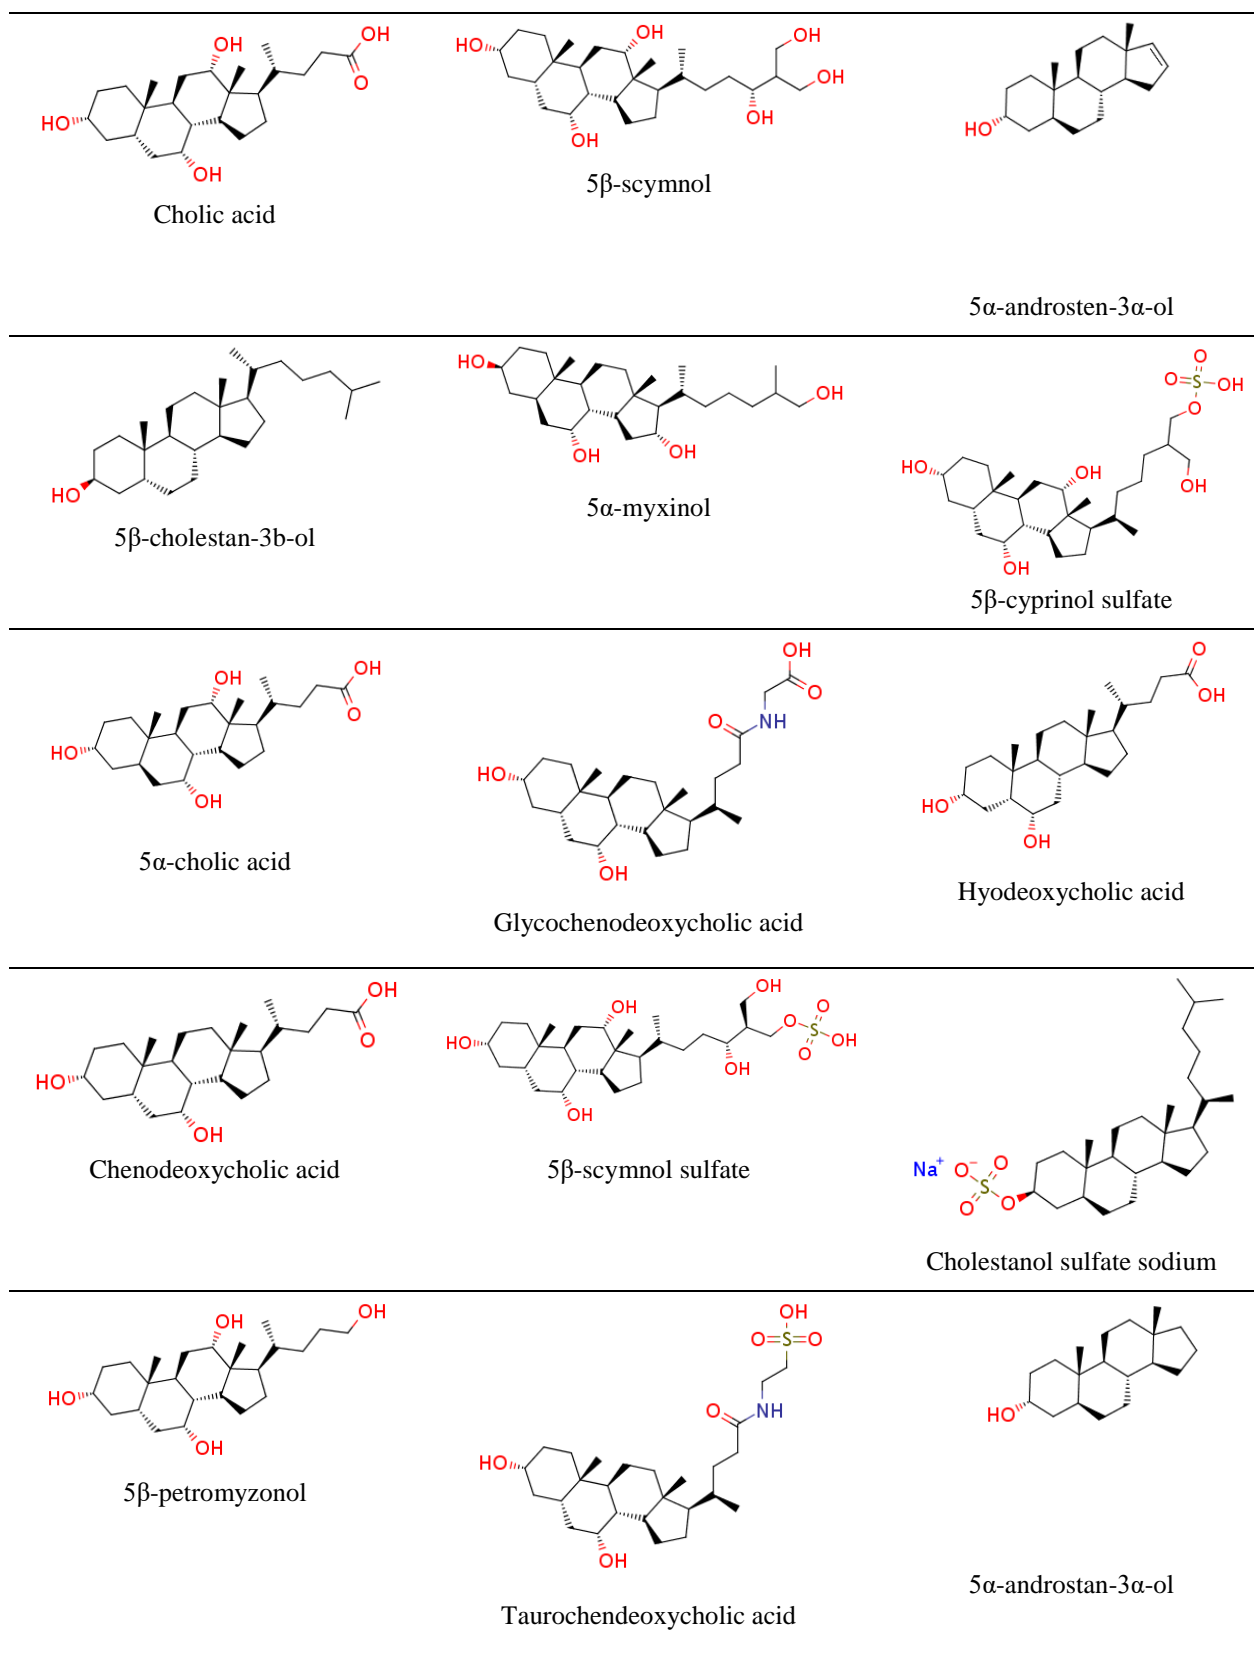

**Table S2. Potency of the steroid compounds for zebrafish ORAs in Hana3A cells.**

| logEC50 <sup>a</sup> | ORA1       | ORA2       | ORA3        | ORA4       | ORA5        | ORA6       |
|----------------------|------------|------------|-------------|------------|-------------|------------|
| LCA                  | -4.7 ± 0.1 | -4.3 ± 0.5 | -4.0 ± 32.4 | -3.0 ± 7.9 | -4.7 ± 0.03 | -4.3 ± 0.2 |
| NLCA                 | -4.8 ± 0.1 | -5.0 ± 7.4 | -4.9 ± 0.1  | -4.0 ± 0.3 | -4.5 ± 1.0  | -4.3 ± 0.1 |
| 3-KLCA               | n.s.       | -4.1 ± 0.9 | n.s.        | n.s.       | n.s.        | n.s.       |
| 7-KLCA               | n.s.       | n.s.       | -2.9 ± 53.7 | n.s.       | n.s.        | n.s.       |
| 12-KLCA              | n.s.       | n.s.       | -4.2 ± 2.2  | n.s.       | n.s.        | n.s.       |
| TLCA                 | -4.7 ± 0.4 | -3.6 ± 3.6 | -4.5 ± 0.5  | -3.5 ± 1.4 | -4.3 ± 0.3  | n.s.       |
| MCA                  | -4.3 ± 0.3 | -4.4 ± 0.4 | n.s.        | n.s.       | n.s.        | n.s.       |
| GLCA                 | -3.4 ± 2.9 | -4.2 ± 5.1 | -4.2 ± 8.7  | n.s.       | -4.1 ± 1.0  | n.s.       |
| ChA                  | n.s.       | n.s.       | n.s.        | n.s.       | n.s.        | -4.0 ± 1.4 |

<sup>a</sup> Mean ± SEM, n = 3–9. (n.s.) non-significant response up to 100 µM.

**Table S3. Zebrafish behavioral responses to ORA ligands.**

| Stimulus                      | <i>n</i> | Displacement <sup>a</sup><br>(% of tank length) | <i>p</i> value <sup>b</sup> | Average velocity <sup>c</sup><br>(% of no stimulus) | <i>p</i> value |
|-------------------------------|----------|-------------------------------------------------|-----------------------------|-----------------------------------------------------|----------------|
| No stimulus                   | -        | -8.0 ± 1.5                                      | -                           | 100.0 ± 33.2                                        | -              |
| Tank water (negative control) | 5        | -11.6 ± 1.2                                     | 0.5944                      | n.a.                                                | n.a.           |
| Food (positive control)       | 6        | 25.4 ± 4.3                                      | <0.0001                     | 92.9 ± 36.2                                         | 0.7174         |
| LCA                           | 12       | 28.0 ± 2.6                                      | <0.0001                     | 61.9 ± 41.1                                         | 0.1315         |
| ChA                           | 11       | 9.0 ± 4.6                                       | 0.0110                      | 68.1 ± 26.2                                         | 0.1409         |

<sup>a</sup> Mean ± SEM, measured as average distance to initial fish position, expressed in percentage of tank length after stimulus addition.

<sup>b</sup> Tested with one-way ANOVA and corrected with Holm-Sidak multiple comparison test. (n.a.) not available.

<sup>c</sup> Mean ± SEM, fish track length summed over measurement time (30 frames/second during 5 minutes each phase).

**Table S4. ORA sequence identity and similarity.**

Pair-wise percentage sequence identity (lower triangular) and similarity (upper triangular) of the predicted transmembrane domain among the ORAs and the template.

| (%)    | hAGTR1 | ORA1 | ORA2 | ORA3 | ORA4 | ORA5 | ORA6 |
|--------|--------|------|------|------|------|------|------|
| hAGTR1 | 100    | 32   | 32   | 37   | 37   | 30   | 39   |
| ORA1   | 16     | 100  | 56   | 36   | 37   | 37   | 39   |
| ORA2   | 13     | 38   | 100  | 42   | 38   | 40   | 47   |
| ORA3   | 19     | 19   | 24   | 100  | 44   | 35   | 38   |
| ORA4   | 16     | 20   | 22   | 27   | 100  | 31   | 33   |
| ORA5   | 16     | 17   | 19   | 18   | 16   | 100  | 43   |
| ORA6   | 22     | 16   | 23   | 15   | 17   | 25   | 100  |

**Table S5. Effects of point mutations on the ORAs' response to ligands.**

| <b>ORA5-LCA</b>        | <b>Efficacy (% of wt)<sup>a</sup></b> | <b>p value<sup>b</sup></b> | <b>ORA6-LCA</b>        | <b>Efficacy (% of wt)</b> | <b>p value</b> |
|------------------------|---------------------------------------|----------------------------|------------------------|---------------------------|----------------|
| R12 <sup>1.39</sup> A  | 125 ± 22.2                            | n.s.                       | R48 <sup>1.39</sup> A  | 55.6 ± 14.6               | 0.0288         |
| P62 <sup>2.60</sup> Y  | 44.2 ± 23.3                           | 0.0293                     | Y97 <sup>2.60</sup> A  | 60.8 ± 12.9               | 0.0288         |
| D87 <sup>3.33</sup> A  | 24.1 ± 19.0                           | 0.0022                     | V121 <sup>3.33</sup> D | 150 ± 16.1                | 0.0288         |
| Y177 <sup>5.42</sup> A | 24.2 ± 19.0                           | 0.0022                     | K215 <sup>5.39</sup> A | 55.2 ± 14.6               | 0.0288         |
| H252 <sup>6.51</sup> A | 53.2 ± 19.0                           | 0.0293                     | Y286 <sup>6.51</sup> H | 65.8 ± 14.6               | 0.0484         |
| R256 <sup>6.55</sup> H | 29.6 ± 21.2                           | 0.0064                     | F306 <sup>7.39</sup> A | 46.2 ± 14.6               | 0.0065         |
| K269 <sup>7.36</sup> A | 25.6 ± 20.0                           | 0.0033                     | T309 <sup>7.42</sup> A | 47.1 ± 16.1               | 0.0288         |
| N272 <sup>7.39</sup> A | 19.0 ± 23.3                           | 0.0055                     | <b>ORA5-ChA</b>        | <b>Efficacy (% of wt)</b> | <b>p value</b> |
| N272 <sup>7.39</sup> F | 238 ± 21.2                            | <0.0001                    | P62 <sup>2.60</sup> Y  | 343 ± 96.4                | 0.0417         |
| <b>ORA2-LCA</b>        | <b>Efficacy (% of wt)</b>             | <b>p value</b>             | E90 <sup>3.36</sup> A  | 395 ± 102                 | 0.0291         |
| R61 <sup>2.57</sup> A  | 33.8 ± 16.2                           | 0.0355                     | Y177 <sup>5.42</sup> F | 450 ± 110                 | 0.0218         |
|                        |                                       |                            | N272 <sup>7.39</sup> F | 344 ± 96.4                | 0.0417         |

<sup>a</sup> Mean ± SEM at 100 μM concentration, n = 3–8.

<sup>b</sup> Tested with one-way ANOVA and corrected with Holm-Sidak multiple comparison test.

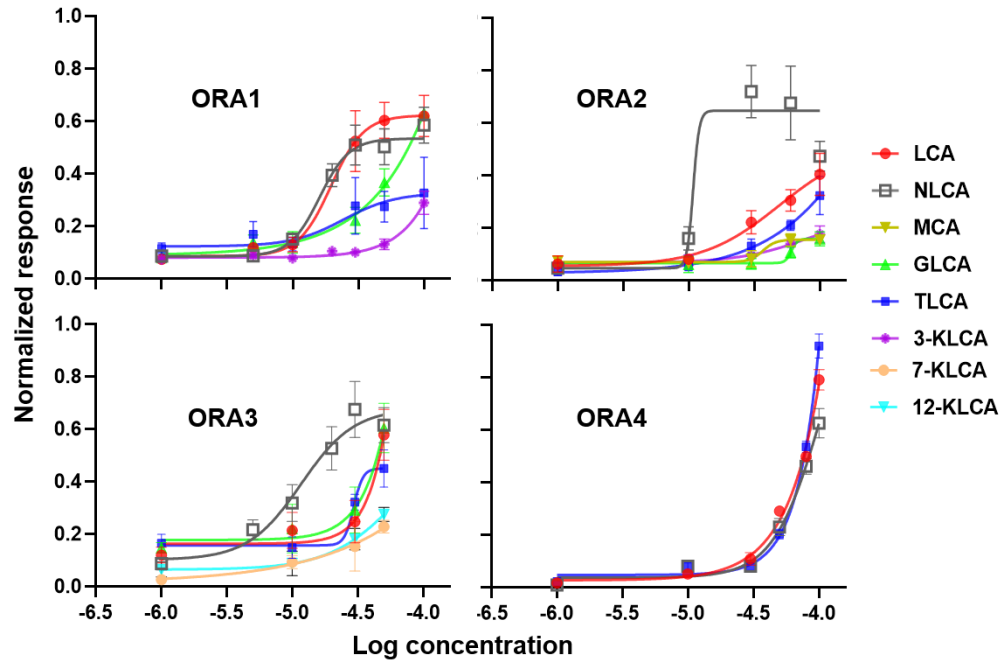

Fig. S1 Dose-response curves for the ORA ligands identified.

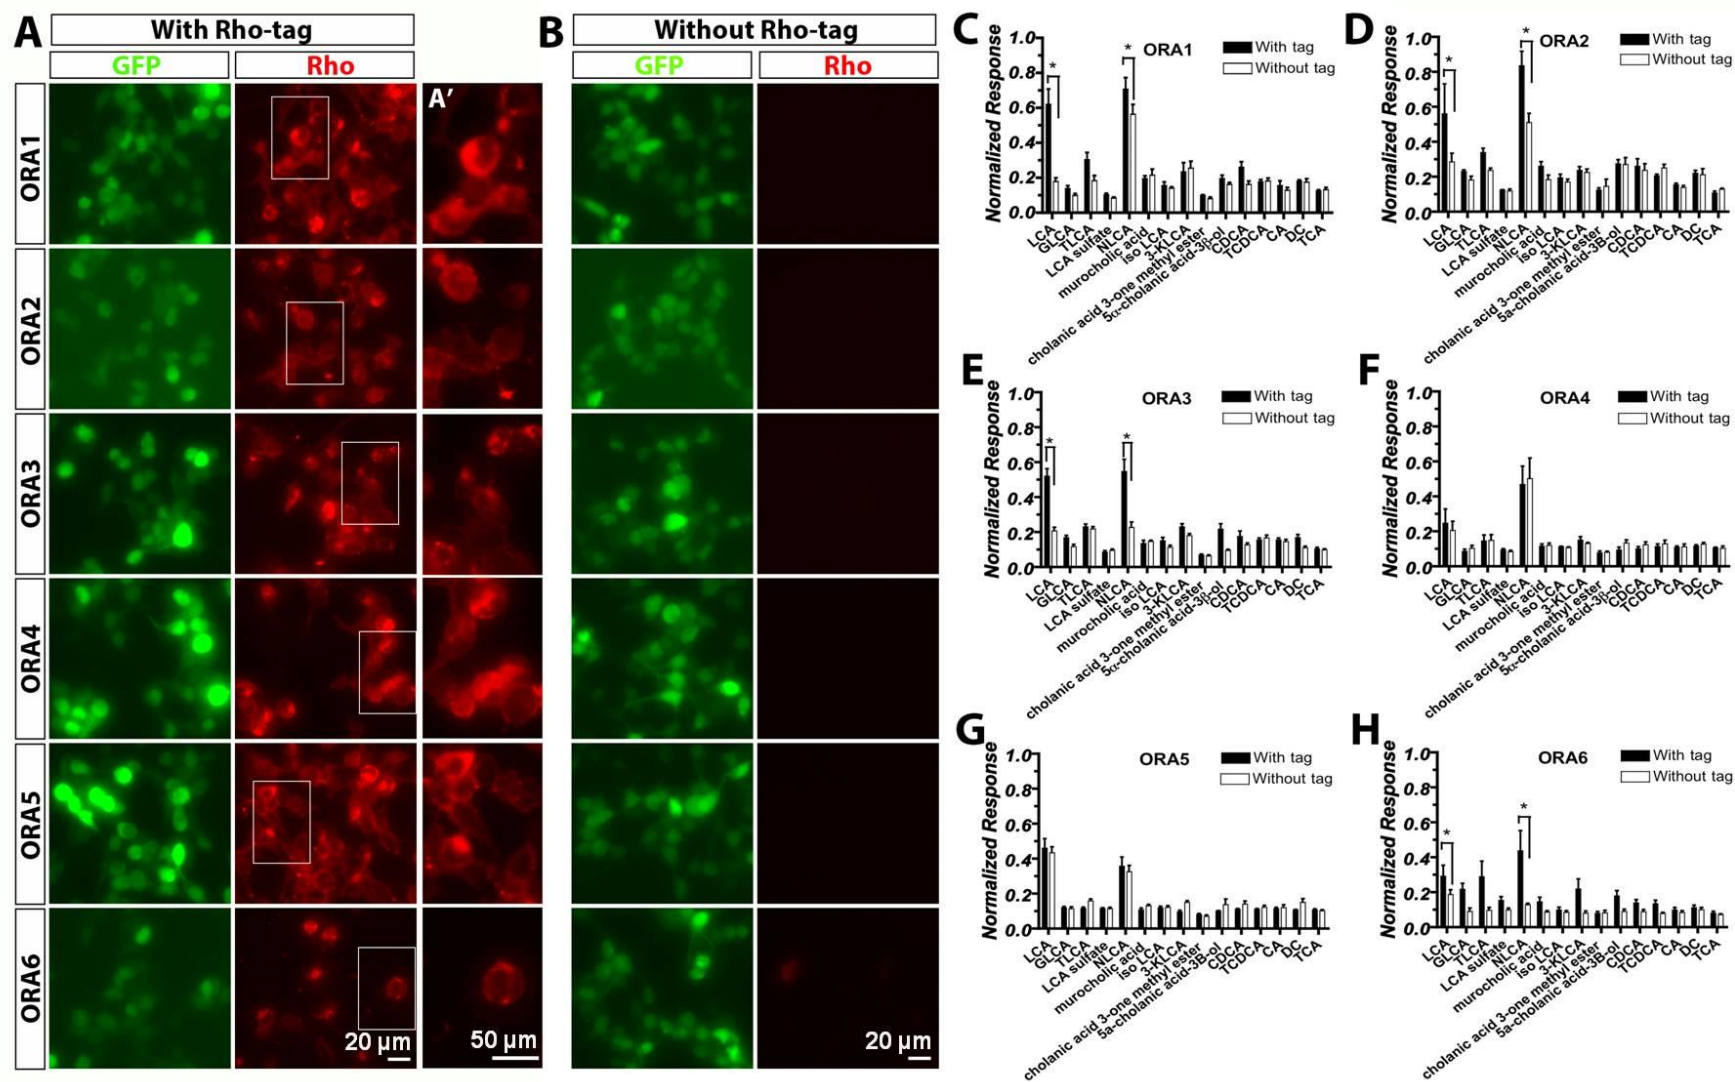

**Fig. S2 Rhodopsin tag facilitated surface expression of zebrafish ORAs in Hana3A cells.** (A, B) Cells were transfected with Rho-tagged ORAs and green fluorescent protein (GFP, green) and underwent live cell immunostaining with Rho-antibody (red). The square areas in the Rho staining images are magnified in (A'), showing the surface localization of the Rho-tagged receptors. (C-H) Responses of Rho-tagged and untagged ORAs to the compounds at 30  $\mu$ M concentration.



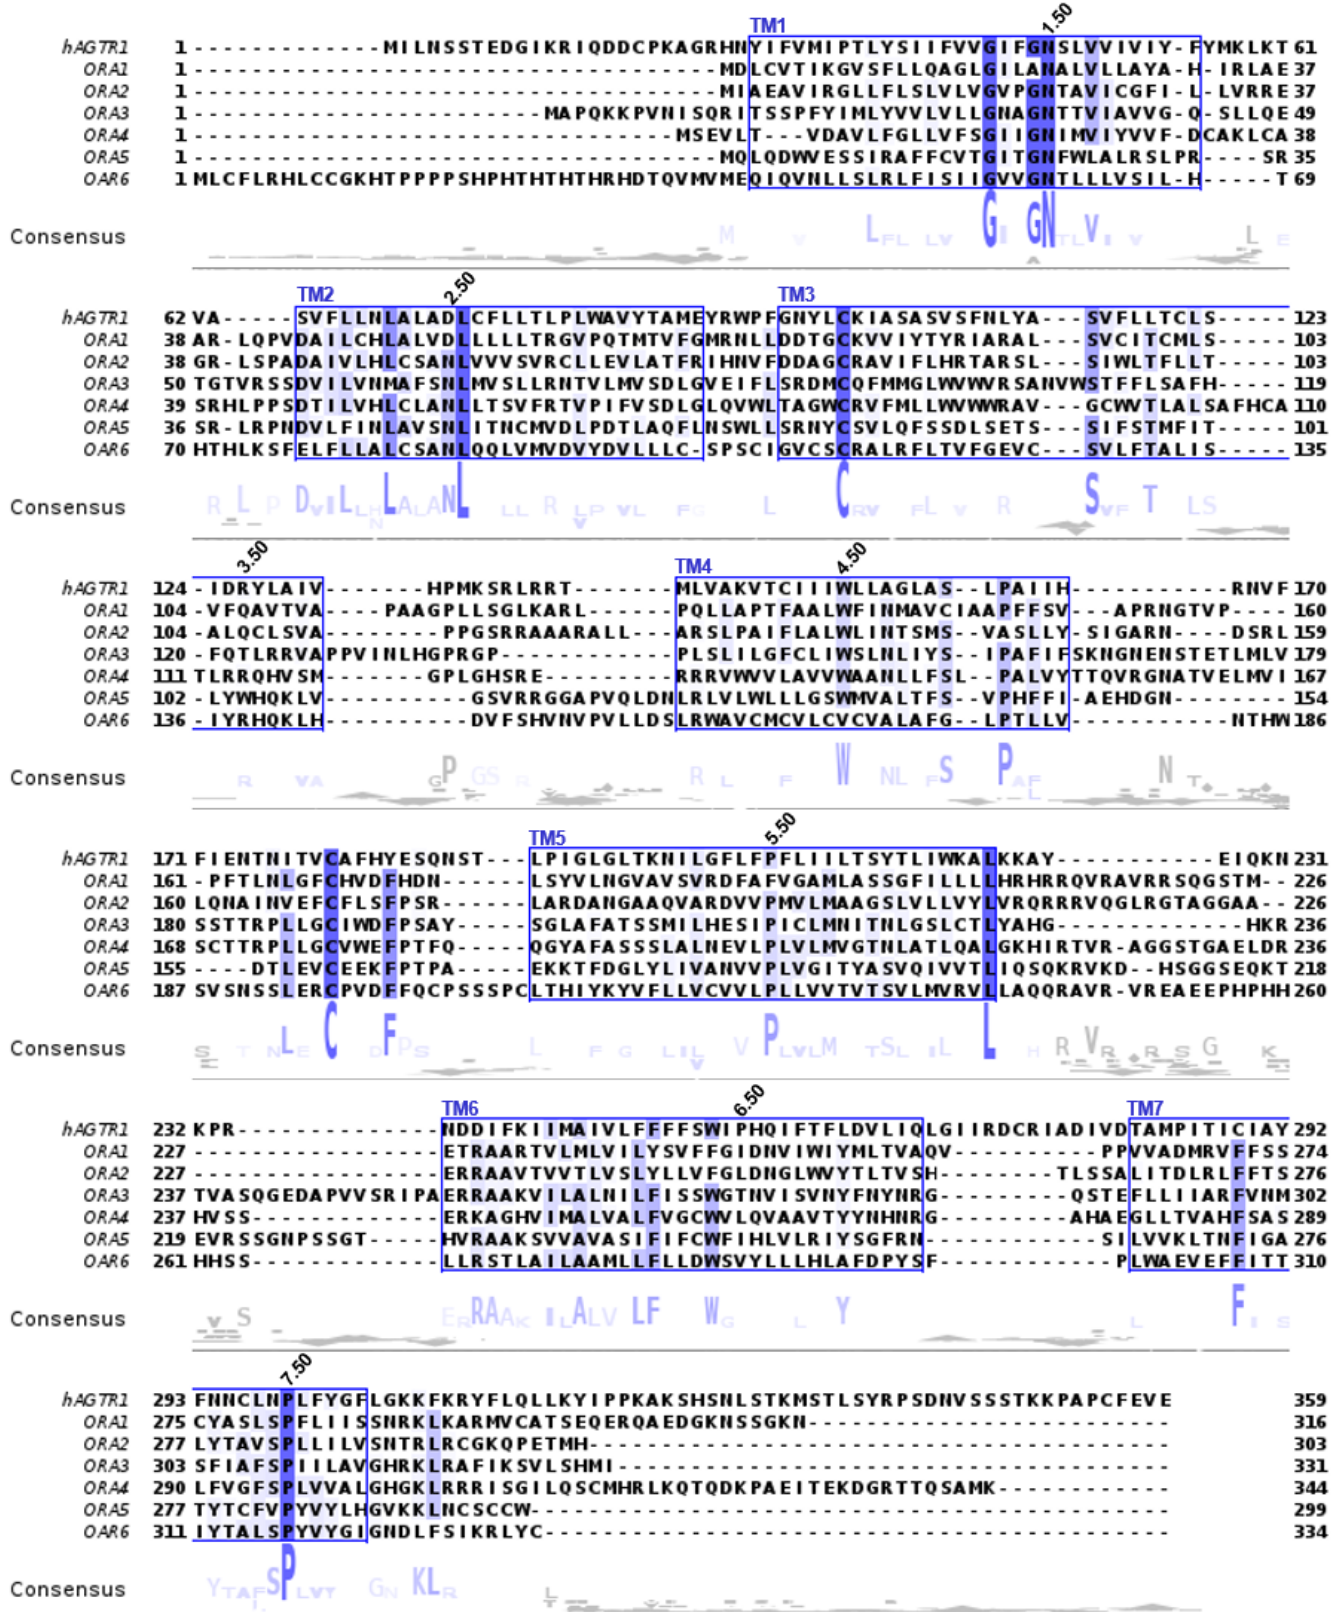

Fig. S3 Sequence alignment of zebrafish ORAs with hAGTR1. The TM domains are boxed. The most conserved position in each TM helix is labeled with the Ballesteros-Weinstein number.



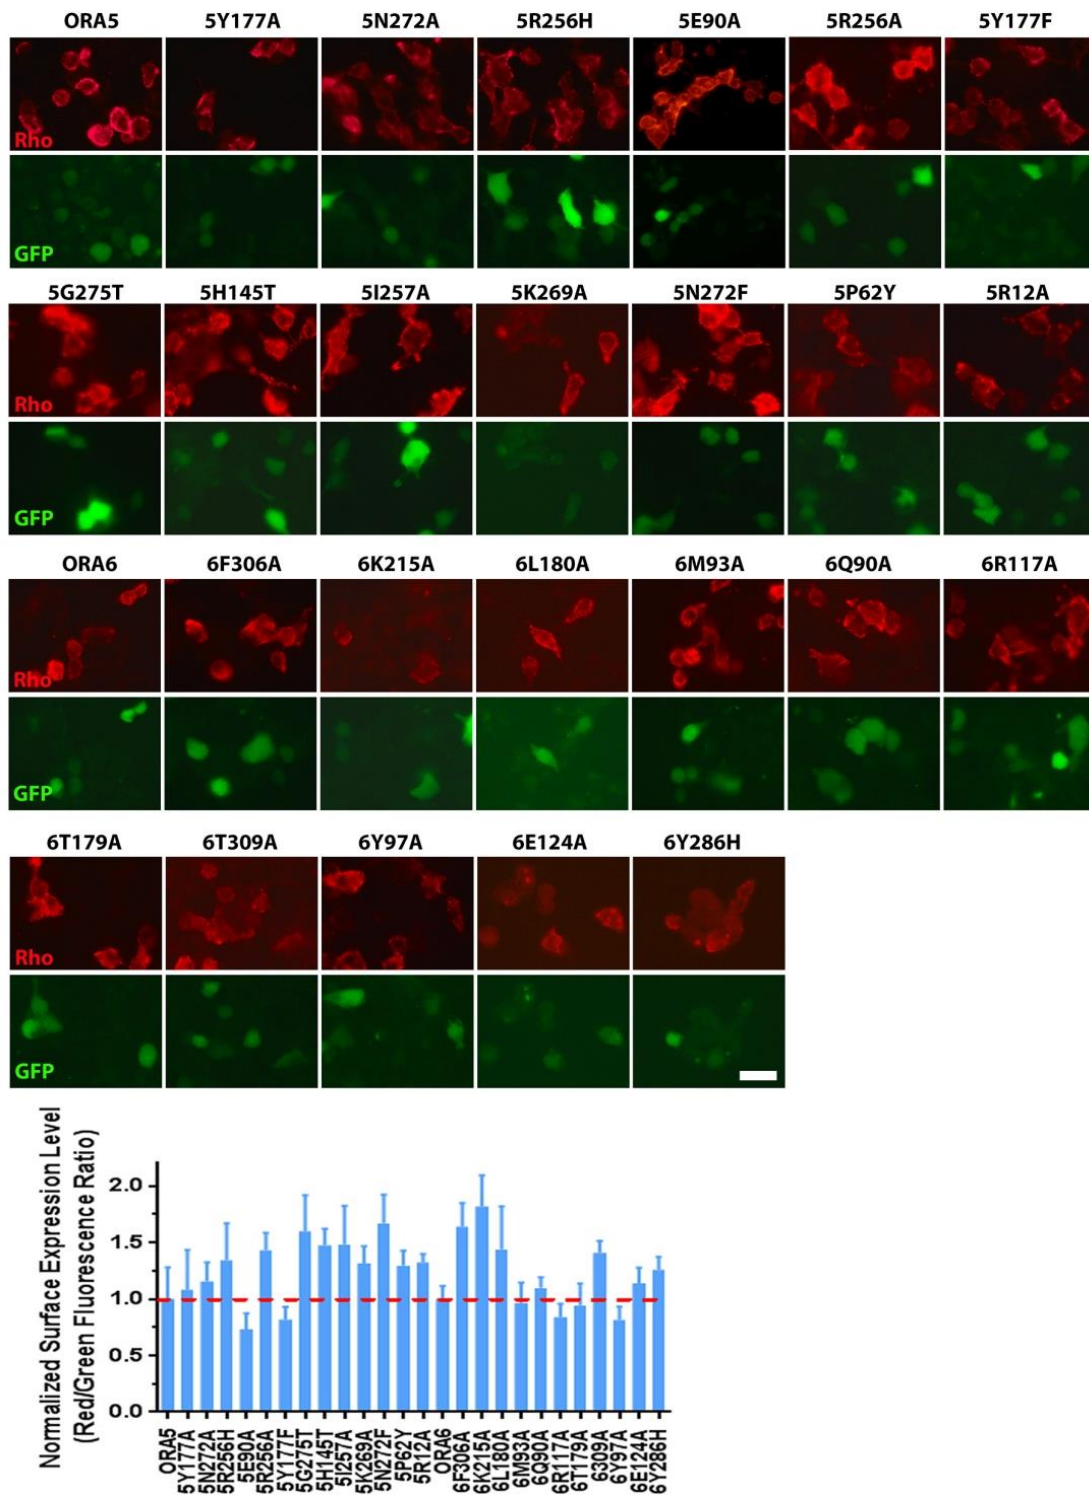

**Fig. S4** Surface expression of ORA5 and ORA6 *wt* and mutants verified by fluorescence activated cell sorting (FACS). The ratio of red (Rho<sup>+</sup>)/green (GFP<sup>+</sup>) fluorescence intensity (normalized to that in *wt* ORA5 or ORA6) was used to evaluate the surface expression level of the mutants. Scale bar: 20  $\mu$ m.

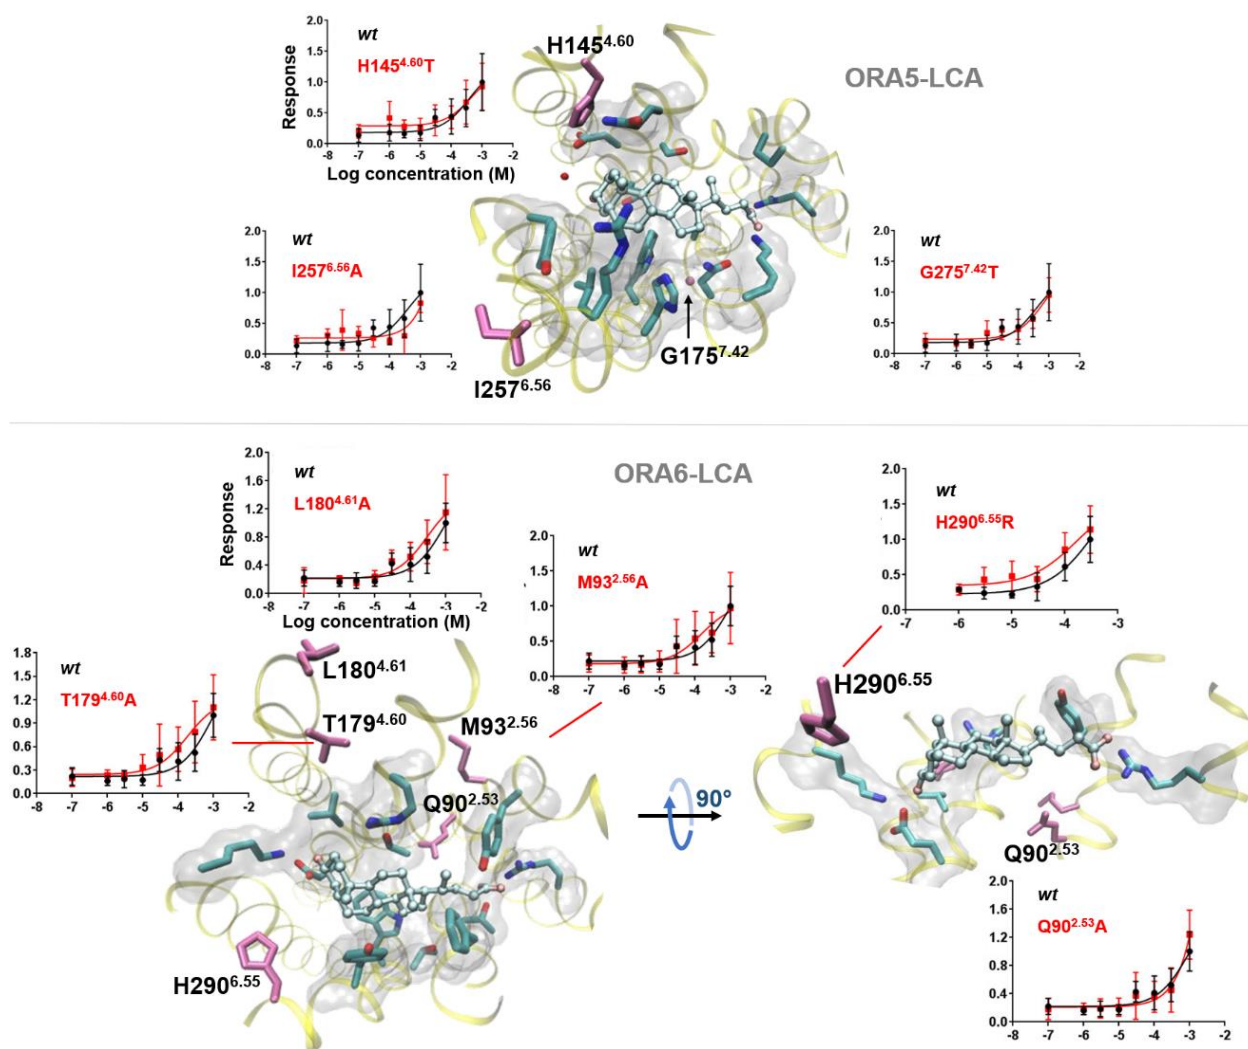

**Fig. S5 Control mutations that have marginal effects on the receptors' response to LCA.** The mutation sites are in magenta sticks.

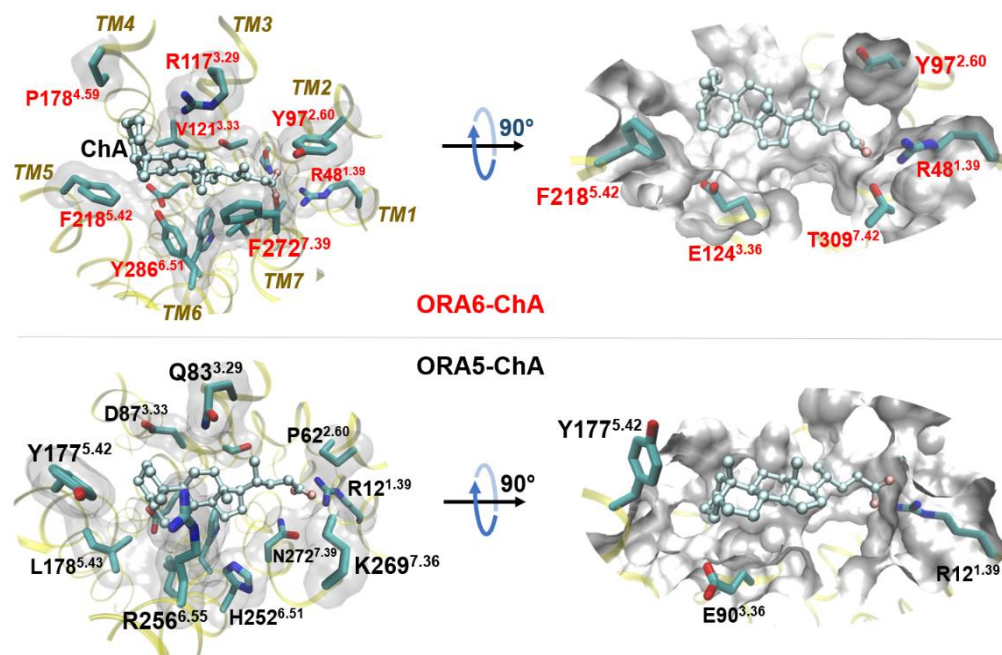

**Fig. S6 Predicted ChA binding mode in *wt* ORA5 and ORA6.**

### Supplementary reference

1. Todeschini R, Consonni V (2009) Molecular Descriptors for Chemoinformatics, vol I/II. Wiley-VCH Verlag GmbH & Co. KGaA, Weinheim, Germany
